# Supplementary material
Source: PubMed Central journal article supplement (PMC3606823)
Supplement: NIHMS447138-supplement-supplement_1.pdf [file NIHMS447138-supplement-supplement_1.pdf]

1  
2  
3  
4  
5  
6  
7  
8  
9  
**Figure-4:** Citrulline assay showing that the conversion of ADMA to L-citrulline by DDAH1 is proportional to time, temperature and enzyme concentration. Data is averaged from at least duplicate experiments.

10  
11  
12  
13  
14  
15  
16  
17  
18  
**Figure-5:** Curve fit data showing inhibition of human DDAH-1 activity by selected small molecules using the CPM assay: **A)** ChemDiv Compound 2548-0707 **B)** ChemDiv Compound 2548-0703 **C)** 4-MMP and **D)** SCH-202676. The inhibitory concentration at 50% ( $IC_{50}$ ) was calculated using Assay Explorer software.

19  
20  
21  
22  
23  
24  
25  
26  
27  
**Figure-6:** Time-dependent inhibition study of two small molecules, phenylmercuric acetate and 4-chloromercuribenzoic acid (each at 50  $\mu$ M final concentration), using the fluorometric CPM assay (30 nM final enzyme concentration). Values are mean  $\pm$  SEM. Experiments were performed in triplicates.

#### 28 29 **Supplemental Figures:**

30  
31  
32  
33  
34  
35  
36  
37  
38  
39  
40  
41  
42  
43  
44  
45  
46  
47  
48  
49  
50  
51  
52  
53  
54  
55  
56  
57  
58  
59  
60  
**Supplemental Figure S1:** Measurement of L-citrulline from primary human endothelial cell lysate. Cells were treated with L-Arginine or Vehicle for 24 h and assayed for L-Citrulline levels. Values are mean  $\pm$  SEM. Experiments were performed in triplicates. \*p <0.05.

1  
2  
3  
4  
5  
6  
7  
8  
9  
10  
11  
12  
13  
14  
15  
16  
17  
18  
19  
20  
21  
22  
23  
24  
25  
26  
27  
28  
29  
30  
31  
32  
33  
34  
35  
36  
37  
38  
39  
40  
41  
42  
43

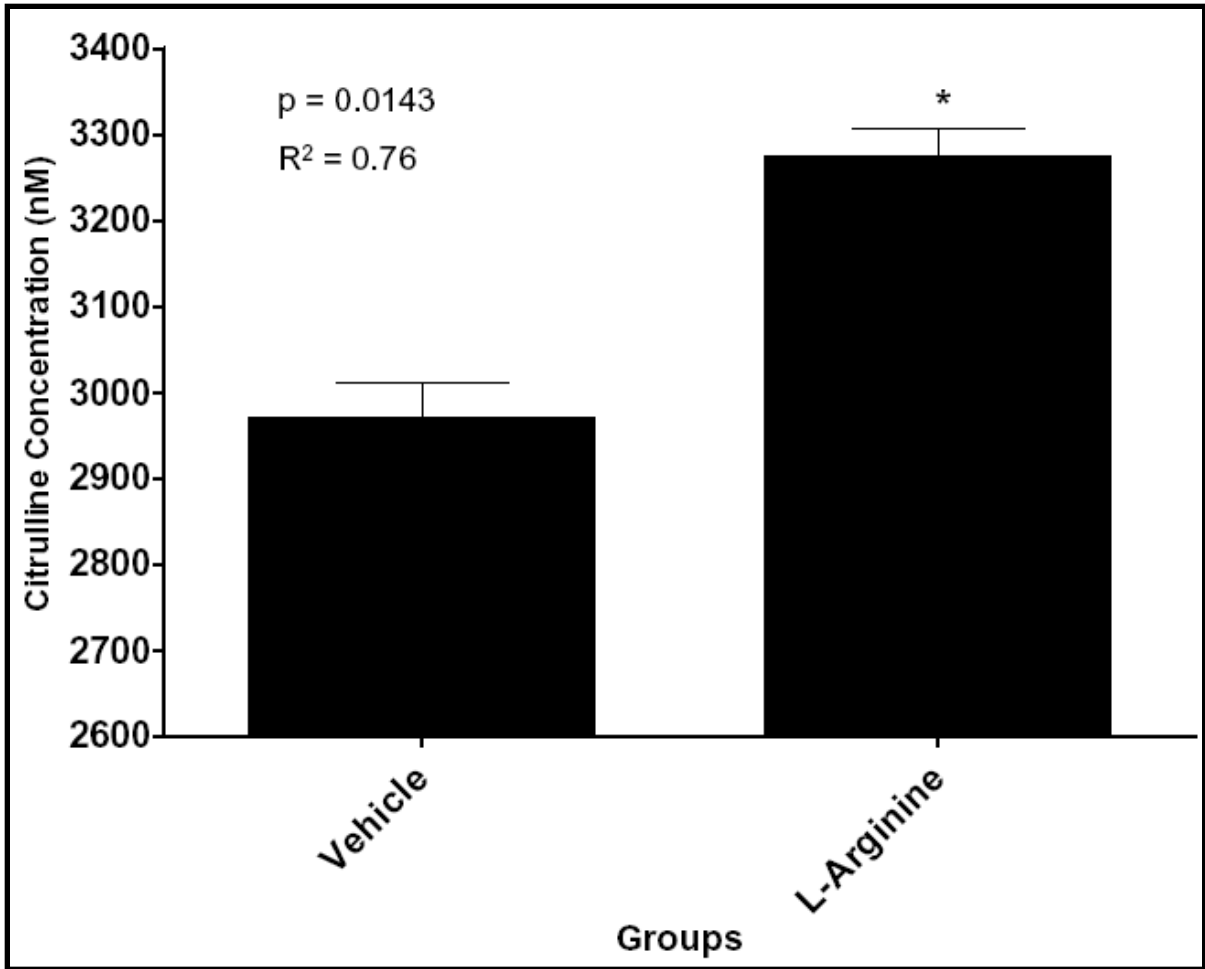

Figure: S1
